# Supplementary material for: Adhesive anti-fibrotic interfaces on diverse organs
Source: PubMed Central journal article supplement (PMC11168934; doi:10.1038/s41586-024-07426-9), 2024-05-22
Supplement: 41586_2024_7426_MOESM1_ESM.pdf [file 41586_2024_7426_MOESM1_ESM.pdf]

**Supplementary information**

---

**Adhesive anti-fibrotic interfaces on diverse organs**

---

In the format provided by the authors and unedited

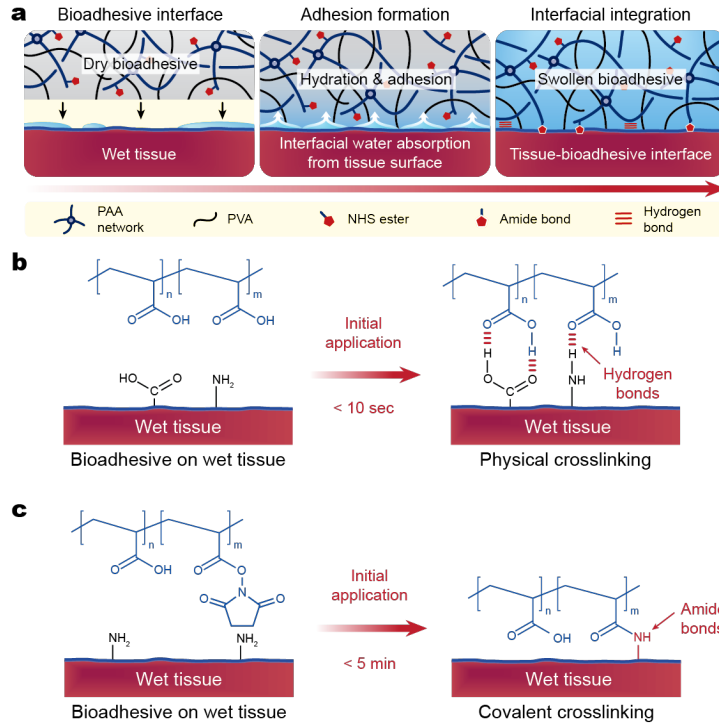

**Supplementary Fig. 1 | Adhesion mechanism and chemistry of the adhesive implant. a**, Schematic illustrations for adhesion of the adhesive implant to wet tissues. **b**, Schematic illustrations for physical crosslinking between the adhesive implant and the tissue by hydrogen bonds. **c**, Schematic illustrations for covalent crosslinking between the adhesive implant and the tissue by amide bonds.

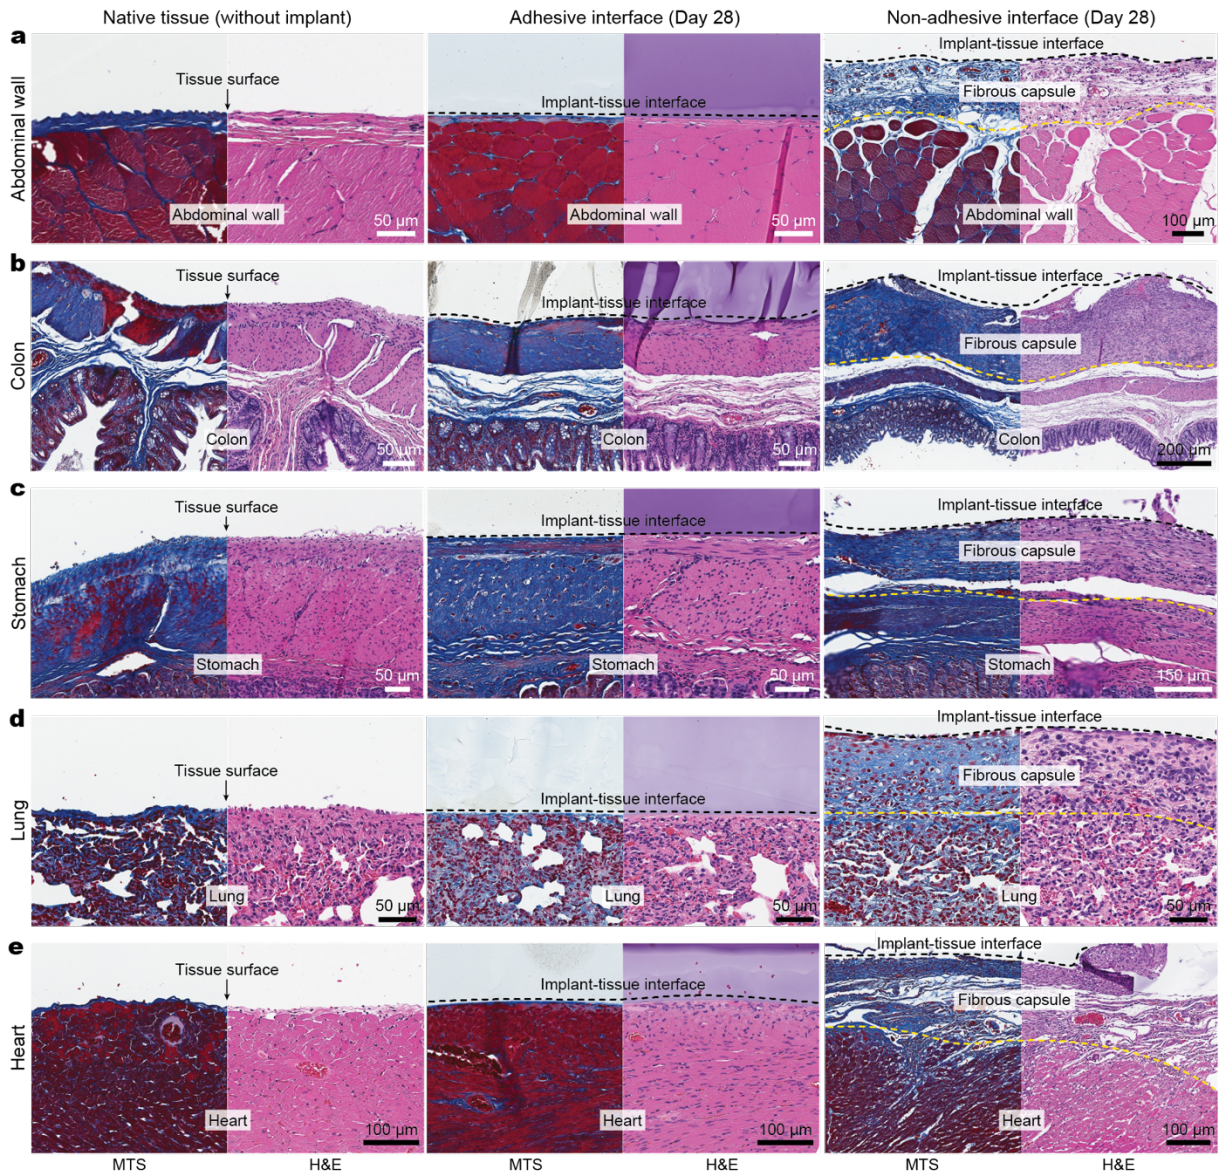

**Supplementary Fig. 2 | Adhesive implant-tissue interface on diverse organs.** a-e, Representative histology images stained with Masson's trichrome (MTS) and hematoxylin and eosin (H&E) for native tissue (left), adhesive implant (middle), and non-adhesive implant (right) collected on day 28 post-implantation to the abdominal wall (a), colon (b), stomach (c), lung (d), and heart (e). Black and yellow dotted lines in the images indicate the implant-tissue interface and the fibrous capsule-tissue interface, respectively. The experiment was repeated independently ( $n = 4$  per group) with similar results.

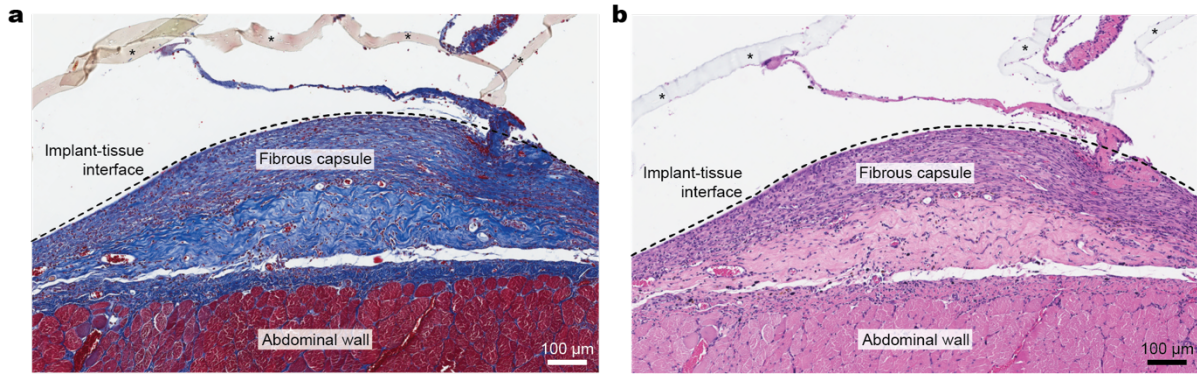

**Supplementary Fig. 3 | Polyurethane mock device.** a,b, Representative histology images stained with Masson's trichrome (a) and hematoxylin and eosin (b) of the polyurethane mock device collected on day 28 post-implantation to the abdominal wall. \* in images indicates the implant; black dotted lines indicate the implant-tissue interface. The experiment was repeated independently ( $n = 4$ ) with similar results.



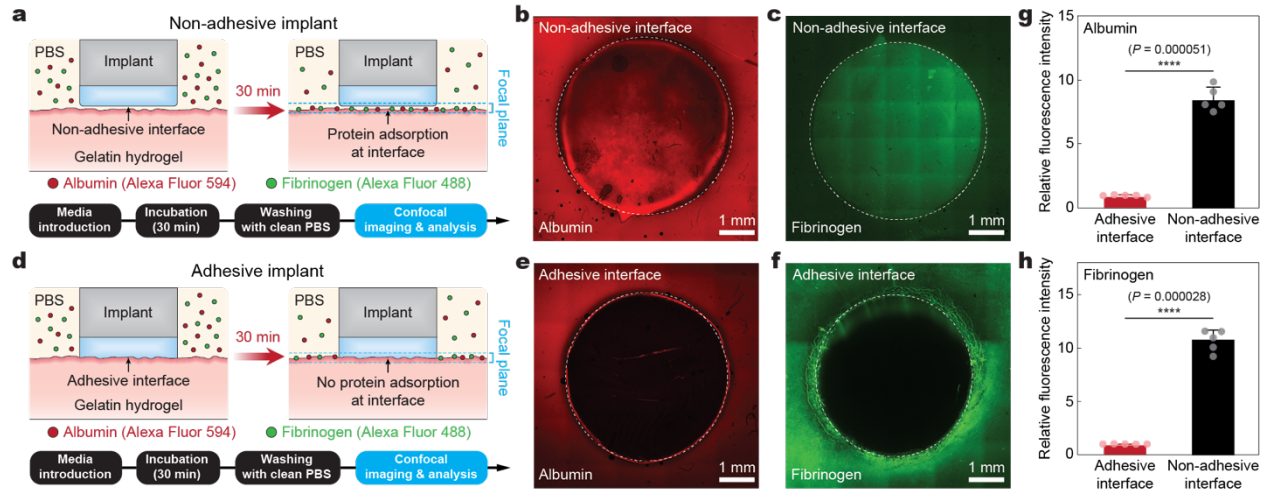

**Supplementary Fig. 4 | In vitro protein adsorption assay.** **a-c**, Schematic illustration of the experimental setup (a) and representative confocal microscope images for in vitro albumin (b) and fibrinogen (c) adsorption assay for the non-adhesive implant. **d-f**, Schematic illustration of the experimental setup (d) and representative confocal microscope images for in vitro albumin (e) and fibrinogen (f) adsorption assay for the adhesive implant. **g,h**, Relative fluorescence intensity at the implant-substrate interface measured 30 min after co-culture for albumin (g) and fibrinogen (h). Values in **g,h** represent the mean and the standard deviation ( $n = 5$ ; independent samples). Statistical significance and  $P$  values are determined by two-sided unpaired  $t$ -tests; \*\*\*\* $P < 0.0001$ .

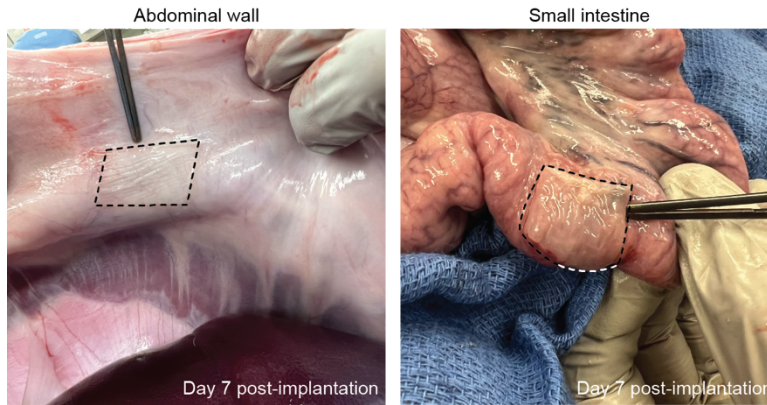

**Supplementary Fig. 5 | In vivo implantation of the adhesive implants on porcine organs.** Photographs of the porcine abdominal wall and small intestine on day 7 post-implantation for the adhesive implant. Black dotted lines in photographs indicate the boundary of implants.

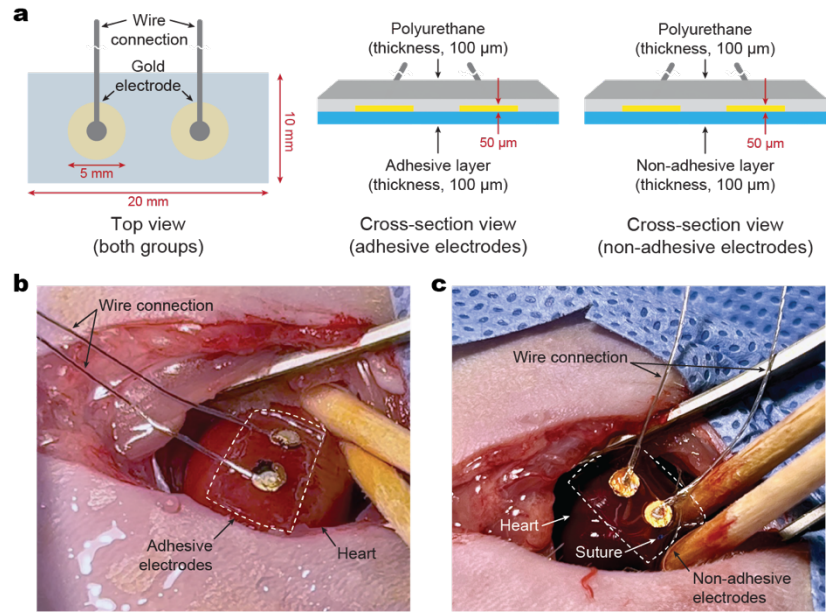

**Supplementary Fig. 6 | Electrodes with the adhesive and non-adhesive interfaces.** **a**, Schematic illustrations for electrodes with the adhesive and the non-adhesive interfaces. **b,c**, Photographs of electrodes with the adhesive interface (**b**) and the non-adhesive interface (**c**) implanted to the rat epicardial surface. White dotted lines in photographs indicate the boundary of implants.

**Supplementary Table 1 | Luminex multiplex assays for protein profiling of rat abdominal wall tissues.** Data were normalized per total amount of proteins extracted and are represented as the mean  $\pm$  standard deviation ( $n = 3$  tissue lysates; independent biological replicates). Statistical significance and  $P$  values are determined by two-sided unpaired  $t$ -tests;  $*P < 0.05$  (vs. non-adhesive interface for the same time point).

| Molecule<br>(pg mg <sup>-1</sup> protein) | Non-adhesive interface |                     | Adhesive interface  |                    |
|-------------------------------------------|------------------------|---------------------|---------------------|--------------------|
|                                           | Day 3                  | Day 7               | Day 3               | Day 7              |
| IL-1 $\alpha$                             | 6.87 $\pm$ 2.61        | 10.47 $\pm$ 5.38    | 3.87 $\pm$ 0.45     | 8.75 $\pm$ 5.08    |
| IL-1 $\beta$                              | 107.65 $\pm$ 129.51    | 125.97 $\pm$ 130.24 | 20.95 $\pm$ 4       | 26.77 $\pm$ 8.04   |
| IL-6                                      | 31.48 $\pm$ 45.88      | 50.44 $\pm$ 60      | 15.31 $\pm$ 11.07   | 18.74 $\pm$ 6.33   |
| IL-12P70                                  | 1.05 $\pm$ 0.23        | 1.18 $\pm$ 0.32     | 1.74 $\pm$ 0.28*    | 1.7 $\pm$ 0.35     |
| IL-17                                     | 3.18 $\pm$ 0.34        | 4.04 $\pm$ 1.2      | 3.22 $\pm$ 0.47     | 3.74 $\pm$ 0.2     |
| IL-18                                     | 394.21 $\pm$ 20.14     | 430.18 $\pm$ 111.11 | 192.43 $\pm$ 28.83* | 145.5 $\pm$ 12.14* |
| TNF- $\alpha$                             | 0.58 $\pm$ 0.02        | 0.98 $\pm$ 0.4      | 0.69 $\pm$ 0.07     | 0.65 $\pm$ 0.11    |
| MCP-1                                     | 53.77 $\pm$ 44.43      | 64.64 $\pm$ 28.67   | 47.47 $\pm$ 16.12   | 34.17 $\pm$ 2.23   |
| G-CSF                                     | 0.2 $\pm$ 0.05         | 0.25 $\pm$ 0.03     | 0.36 $\pm$ 0.06*    | 0.34 $\pm$ 0.06    |
| IL-4                                      | 12.62 $\pm$ 5.8        | 12.61 $\pm$ 1.71    | 17.41 $\pm$ 3.46    | 13.13 $\pm$ 1.61   |
| IL-10                                     | 4.64 $\pm$ 2.63        | 9.93 $\pm$ 11.36    | 3.03 $\pm$ 0.35     | 2.31 $\pm$ 0.25    |
| CCL3                                      | 17.34 $\pm$ 3.56       | 77.24 $\pm$ 73.93   | 9.21 $\pm$ 1.15*    | 20.74 $\pm$ 14.28  |
| CCL5                                      | 10.15 $\pm$ 1.49       | 69.24 $\pm$ 31.03   | 5.88 $\pm$ 0.84*    | 38.57 $\pm$ 25.39  |



**Supplementary Table 2 | Mechanical properties of the implants in this study**

| <b>Implant</b> | <b>Young's modulus</b> | <b>Thickness</b>  |
|----------------|------------------------|-------------------|
| Polyurethane   | 2.1 MPa                | 100 $\mu\text{m}$ |
| Gold electrode | 79 GPa                 | 50 $\mu\text{m}$  |
